# Supplementary material for: Analysis of biofluid metabolomic profiles to the discovery of biomarkers in age-related macular degeneration
Source: PubMed Central journal article supplement — BMJ Open Ophthalmol. 2024 Dec 24;9(1):e001573. doi: 10.1136/bmjophth-2023-001573 (PMC11683933; doi:10.1136/bmjophth-2023-001573), 2024-12-24
Supplement: bmjophth-9-1-s003.pdf [file bmjophth-9-1-s003.pdf]

| Biofluid | Country | Study population                                                    | Targeted/Untargeted sequencing technique | Statistics                                | Biomarker panel and Evaluation                                                                                                                                                                                                                      | Reference |
|----------|---------|---------------------------------------------------------------------|------------------------------------------|-------------------------------------------|-----------------------------------------------------------------------------------------------------------------------------------------------------------------------------------------------------------------------------------------------------|-----------|
| Plasma   | China   | CNV (n = 67), PCV (n = 60) and control (n = 50)                     | Untargeted LC-MS/MS                      | Variance analysis and the chi-square test | 17 differential metabolites.                                                                                                                                                                                                                        | 14        |
| Plasma   | America | IAMD (n = 91), NVAMD (n = 100), and non-AMD controls (n = 195).     | Untargeted LC-MS and LC-MS/MS            | Kruskal–Wallis (KW)                       | 158 metabolic features. The 10-fold cross-validation balanced accuracy rate using these discriminatory features was 77.8%.                                                                                                                          | 6         |
| RPE      | America | cultured RPE from donor normal eyes (n = 3) and AMD RPE (n = 4)     | Untargeted LC-MS                         | Student's t test                          | -                                                                                                                                                                                                                                                   | 21        |
| Plasma   | America | NVAMD (n = 100) and control (n = 192)                               | Untargeted LC-MS and LC-MS/MS            | Nested feature selection                  | 159 identified metabolic features. The 159 features produced a 10-fold cross-validation balanced accuracy rate of 96.1% in the training set and a balanced accuracy rate of 75.6% along with an area under the curve (AUC) of 0.83 in the test set. | 7         |
| Plasma   | America | Early AMD, intermediate AMD, late AMD (n = 89) and control (n = 30) | Targeted UPLC-MS                         | Logistic regression analysis              | 87 metabolites. ROC analysis (area under the ROC curve, 0.80; 95% confidence interval, 0.71–0.90).                                                                                                                                                  | 8         |
| Plasma   | USA     | Two cohort AMD (n = 391) and control (n = 100)                      | Untargeted UPLC-MS                       | Logistic regression models                | 69 metabolites. (Stage+2Eye model) (AUC = 0.815; 95% CI: 0.771–0.860) and the model comparing patients with AMD versus controls (AMD/                                                                                                               | 9         |

带格式表格[Charlies Wu]

设置格式[Charlies Wu]: 字体: (默认) Times New Roman, 11 磅

删除[Charlies Wu]: 22

设置格式[Charlies Wu]: 字体: (默认) Times New Roman, 11 磅

删除[Charlies Wu]: 7

设置格式[Charlies Wu]: 字体: (默认) Times New Roman, 11 磅

设置格式[Charlies Wu]: 字体: (默认) Times New Roman, 11 磅

删除[Charlies Wu]: 9

设置格式[Charlies Wu]: 字体: (默认) Times New Roman, 11 磅

删除[Charlies Wu]: 10

设置格式[Charlies Wu]: 字体: (默认) Times New Roman, 11 磅

删除[Charlies Wu]: 11





Supplemental Table 2: Relevant Metabolomics Studies Included in Our Study.

AMD: age-related macular degeneration; PCV: polypoidal choroidal vasculopathy; NVAMD: neovascular age-related macular degeneration; IAMD: intermediate age-related macular degeneration; RPE: retinal pigment epithelial; LC-MS: liquid chromatography-mass spectrometry; UPLC: ultra-performance liquid chromatography; TOF: time of flight; Q-TOF, quadrupole-time of flight; FTMS: fouriertransform mass spectrometry; GC: gas chromatography; PLS-DA: partial least squares discriminant analysis; OPLS-DA; orthogonal partial least squares discriminant analysis; NMR: nuclear magnetic resonance; ANOVA; one-way analysis of variance.

删除[Charlies Wu]: m

删除[Charlies Wu]: s

删除[Charlies Wu]: i

删除[Charlies Wu]: o

删除[Charlies Wu]: s

设置格式[Charlies Wu]: 字体: (默认) Times New Ro ...

设置格式[Charlies Wu]: 字体: 11 磅
