# Supplementary material for: Analysis of biofluid metabolomic profiles to the discovery of biomarkers in age-related macular degeneration
Source: PubMed Central journal article supplement — BMJ Open Ophthalmol. 2024 Dec 24;9(1):e001573. doi: 10.1136/bmjophth-2023-001573 (PMC11683933; doi:10.1136/bmjophth-2023-001573), 2024-12-24
Supplement: bmjophth-9-1-s004.pdf [file bmjophth-9-1-s004.pdf]

| Pathway Name                                        | Match Status | <i>p</i>  | FDR       | Impact  |
|-----------------------------------------------------|--------------|-----------|-----------|---------|
| Aminoacyl-tRNA biosynthesis                         | 16/48        | 4.85E-07  | 4.08E-05  | 0       |
| Phenylalanine, tyrosine and tryptophan biosyntheses | 4/4          | 4.60E-05  | 0.0019301 | 1       |
| Valine, leucine and isoleucine biosynthesis         | 4/8          | 0.0024643 | 0.067298  | 0       |
| Glyoxylate and dicarboxylate metabolism             | 8/32         | 0.003518  | 0.067298  | 0.16138 |
| Arginine biosynthesis                               | 5/14         | 0.0040058 | 0.067298  | 0.39594 |
| Alanine, aspartate and glutamate metabolism         | 7/28         | 0.0063133 | 0.088386  | 0.53446 |
| Histidine metabolism                                | 5/16         | 0.0076272 | 0.091526  | 0.31147 |
| Nitrogen metabolism                                 | 3/6          | 0.0093472 | 0.098146  | 0       |
| Arginine and proline metabolism                     | 8/38         | 0.01067   | 0.099587  | 0.26779 |
| Pantothenate and CoA biosynthesis                   | 5/19         | 0.016569  | 0.13918   | 0.02143 |
| Taurine and hypotaurine metabolism                  | 3/8          | 0.023114  | 0.16373   | 0.71428 |
| Glutathione metabolism                              | 6/28         | 0.024166  | 0.16373   | 0.1829  |
| beta-Alanine metabolism                             | 5/21         | 0.025339  | 0.16373   | 0.45522 |
| Nicotinate and nicotinamide metabolism              | 4/15         | 0.030349  | 0.18209   | 0.1943  |
| Phenylalanine metabolism                            | 3/10         | 0.043788  | 0.24521   | 0.61904 |

带格式表格[Charlies Wu]

Supplemental Table 3: Results of the Pathway Analysis of Metabolic Biomarkers.

[FDR: false discovery rate.](#)

设置格式[Charlies Wu]: 字体: (默认) Times New Roman, (中文)微软雅黑, 11 磅, 图案: 清除(白色), 字体颜色: 黑色
