# Supplementary material for: Analysis of biofluid metabolomic profiles to the discovery of biomarkers in age-related macular degeneration
Source: PubMed Central journal article supplement — BMJ Open Ophthalmol. 2024 Dec 24;9(1):e001573. doi: 10.1136/bmjophth-2023-001573 (PMC11683933; doi:10.1136/bmjophth-2023-001573), 2024-12-24
Supplement: bmjophth-9-1-s005.pdf [file bmjophth-9-1-s005.pdf]

| Pathway Name                                        | Match status | Expected | P values | FDR      |
|-----------------------------------------------------|--------------|----------|----------|----------|
| Aminoacyl-tRNA biosynthesis                         | 16/22        | 0.362    | 4.86E-25 | 8.70E-23 |
| Arginine and proline metabolism                     | 9/136        | 2.24     | 0.000356 | 0.0227   |
| Histidine metabolism                                | 6/62         | 1.02     | 0.000492 | 0.0227   |
| Valine, leucine and isoleucine biosynthesis         | 4/24         | 0.395    | 0.000566 | 0.0227   |
| beta-Alanine metabolism                             | 6/65         | 1.07     | 0.000635 | 0.0227   |
| Alanine, aspartate and glutamate metabolism         | 7/98         | 1.61     | 0.00106  | 0.0286   |
| Glyoxylate and dicarboxylate metabolism             | 8/128        | 2.11     | 0.00112  | 0.0286   |
| Glutathione metabolism                              | 6/76         | 1.25     | 0.00145  | 0.0325   |
| Biosynthesis of unsaturated fatty acids             | 5/53         | 0.872    | 0.00166  | 0.033    |
| Pantothenate and CoA biosynthesis                   | 5/55         | 0.905    | 0.00196  | 0.0351   |
| Synthesis and degradation of ketone bodies          | 2/5          | 0.0823   | 0.00259  | 0.0422   |
| Glycolysis or Gluconeogenesis                       | 3/23         | 0.378    | 0.00601  | 0.0897   |
| Arginine biosynthesis                               | 5/74         | 1.22     | 0.00712  | 0.098    |
| Sphingolipid metabolism                             | 4/51         | 0.839    | 0.0095   | 0.121    |
| Taurine and hypotaurine metabolism                  | 3/31         | 0.51     | 0.0139   | 0.166    |
| Tyrosine metabolism                                 | 6/125        | 2.06     | 0.0165   | 0.184    |
| Nicotinate and nicotinamide metabolism              | 5/98         | 1.61     | 0.0221   | 0.233    |
| Pyrimidine metabolism                               | 6/139        | 2.29     | 0.0263   | 0.257    |
| D-Glutamine and D-glutamate metabolism              | 2/16         | 0.263    | 0.0277   | 0.257    |
| Valine, leucine and isoleucine degradation          | 5/105        | 1.73     | 0.0287   | 0.257    |
| Lysine degradation                                  | 5/108        | 1.78     | 0.0319   | 0.268    |
| Phenylalanine, tyrosine and tryptophan biosynthesis | 4/74         | 1.22     | 0.0329   | 0.268    |
| Fatty acid biosynthesis                             | 3/45         | 0.74     | 0.0372   | 0.289    |
| Glycerophospholipid metabolism                      | 4/82         | 1.35     | 0.0454   | 0.338    |

带格式表格[Charlies Wu]

Supplemental Table4: KEGG [Analysis of Genes](#) and [Metabolites](#) in AMD.

[FDR: false discovery rate; KEGG: Kyoto Encyclopedia of Genes and Genomes.](#)

删除[Charlies Wu]: a

删除[Charlies Wu]: g

删除[Charlies Wu]: m
