# Supplementary material for: Analysis of biofluid metabolomic profiles to the discovery of biomarkers in age-related macular degeneration
Source: PubMed Central journal article supplement — BMJ Open Ophthalmol. 2024 Dec 24;9(1):e001573. doi: 10.1136/bmjophth-2023-001573 (PMC11683933; doi:10.1136/bmjophth-2023-001573), 2024-12-24
Supplement: bmjophth-9-1-s006.pdf [file bmjophth-9-1-s006.pdf]

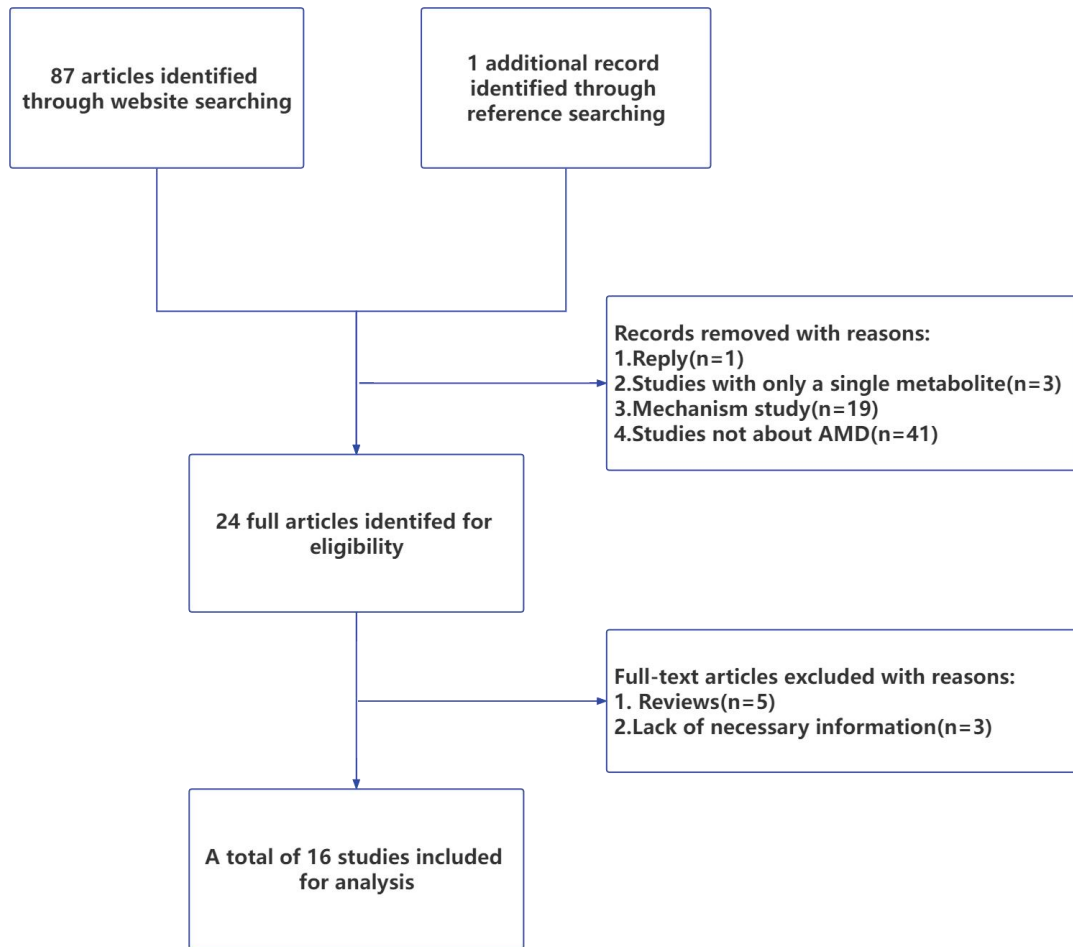

Supplementary Figure 1: Flow diagram of literature search and study selection for metabolite markers of AMD.

AMD: age-related macular degeneration;
